# Supplementary material for: N-acetylcysteine protects against motor, optomotor and morphological deficits induced by 6-OHDA in zebrafish larvae
Source: PeerJ. 2018 Jun 1;6:e4957. doi: 10.7717/peerj.4957 (PMC5985760; doi:10.7717/peerj.4957)
Supplement: Supplemental Information 1 [file peerj-06-4957-s001.xlsx]

## Sheet: Locomotor behavior 
Treatment group	Total Distance	Mean Speed	Maximum acceleration	Absolute turn angle	Imobility time
CRTL	38.0371	0.127385	62.3136	68.9523	269.88
CRTL	33.2422	0.111327	32.8224	74.6591	270
CRTL	65.5385	0.219486	117.225	58.8063	246.2
CRTL	46.8254	0.156816	66.769	51.7885	257.84
CRTL	48.3635	0.161255	128.486	58.9879	255.04
CRTL	40.2086	0.134064	39.596	51.9591	253.8
CRTL	71.4335	0.238175	66.8396	53.2343	240.2
CRTL	28.1574	0.0939583	56.9039	80.9306	272.32
CRTL	75.9556	0.253456	70.5448	49.3745	244.04
6-OHDA	11.2061	0.0373737	4.61396	106.581	298.48
6-OHDA	9.53943	0.0318151	4.5557	113.139	299.04
6-OHDA	8.3675	0.0279066	2.26398	116.329	299.96
6-OHDA	16.712	0.0557366	42.4802	88.9523	293.4
6-OHDA	8.19928	0.0273455	3.10006	115.425	300
6-OHDA	6.0494	0.0201754	1.77672	117.503	300
6-OHDA	55.6163	0.185487	64.9478	72.0656	261.32
6-OHDA	16.8763	0.0562844	77.0583	109.534	293.68
NAC	25.5006	0.0850472	62.4226	85.8917	276.08
NAC	31.4386	0.105513	85.3685	73.6156	268.44
NAC	62.5724	0.208686	108.341	45.1176	249.84
NAC	56.2491	0.187597	84.041	45.4262	249.96
NAC	41.0692	0.137208	45.2624	57.6977	258.8
NAC	35.1437	0.117412	73.1221	69.7868	259.6
NAC	54.8775	0.18334	72.0869	60.1222	248.16
NAC	41.0639	0.137191	34.6938	63.9414	259.56
NAC	35.673	0.118973	65.3178	72.6634	268.24
NAC	60.4791	0.201705	60.7798	65.5176	248.68
NAC	55.2893	0.184396	45.571	53.0194	250.8
NAC+6-OHDA	37.2047	0.124082	83.4769	56.4472	277.56
NAC+6-OHDA	42.5735	0.141987	57.4666	75.0343	259.8
NAC+6-OHDA	20.5437	0.0685155	40.7779	101.28	287.72
NAC+6-OHDA	75.9517	0.253307	54.4124	64.5604	243.24
NAC+6-OHDA	47.5343	0.158532	59.295	71.791	252.2
NAC+6-OHDA	78.8192	0.262871	65.7779	45.9119	234.88
NAC+6-OHDA	43.7274	0.145836	83.3817	61.2468	256.68
NAC+6-OHDA	60.1802	0.200654	78.2887	49.321	251.6
NAC+6-OHDA	21.7779	0.0726124	57.3985	95.3965	280.28
NAC+6-OHDA	52.1451	0.173863	29.5281	60.0693	260.28
NAC+6-OHDA	84.949	0.283239	80.3818	50.5461	241.84

## Sheet: Morphological analysis 
Treatment group	Total lenght	Head lenght	Forebrain width	Midbrain width	Eyes distance
CRTL	3.569	0.712	0.306	0.473	0.114
CRTL	3.651	0.776	0.302	0.47	0.098
CRTL	3.627	0.767	0.279	0.455	0.084
CRTL	3.619	0.688	0.284	0.459	0.093
CRTL	3.541	0.647	0.321	0.455	0.107
CRTL	3.496	0.681	0.275	0.441	0.105
CRTL	3.71	0.71	0.285	0.46	0.096
CRTL	3.273	0.656	0.276	0.444	0.055
CRTL	3.665	0.696	0.298	0.456	0.091
CRTL	3.619	0.677	0.293	0.484	0.093
CRTL	3.564	0.678	0.314	0.481	0.089
CRTL	3.599	0.668	0.275	0.438	0.097
6-OHDA	3.416	0.644	0.291	0.442	0.096
6-OHDA	3.315	0.564	0.253	0.407	0.08
6-OHDA	3.235	0.585	0.282	0.422	0.088
6-OHDA	3.638	0.646	0.287	0.466	0.086
6-OHDA	3.297	0.622	0.296	0.43	0.12
6-OHDA	3.319	0.636	0.25	0.404	0.088
6-OHDA	3.302	0.636	0.254	0.413	0.09
6-OHDA	3.42	0.635	0.263	0.445	0.065
6-OHDA	3.306	0.574	0.241	0.397	0.058
6-OHDA	3.431	0.623	0.26	0.422	0.095
6-OHDA	3.564	0.622	0.251	0.44	0.093
NAC	3.577	0.698	0.301	0.441	0.099
NAC	3.883	0.711	0.34	0.469	0.108
NAC	3.631	0.664	0.318	0.456	0.095
NAC	3.486	0.676	0.293	0.448	0.097
NAC	3.553	0.636	0.271	0.445	0.103
NAC	3.685	0.678	0.32	0.461	0.111
NAC	3.708	0.686	0.323	0.473	0.11
NAC	3.486	0.655	0.306	0.47	0.103
NAC	3.592	0.678	0.279	0.448	0.072
NAC	3.646	0.717	0.299	0.477	0.11
NAC	3.77	0.729	0.325	0.474	0.107
NAC+6-OHDA	3.722	0.719	0.326	0.493	0.12
NAC+6-OHDA	3.623	0.663	0.298	0.429	0.11
NAC+6-OHDA	3.535	0.685	0.291	0.437	0.101
NAC+6-OHDA	3.522	0.624	0.296	0.433	0.096
NAC+6-OHDA	3.657	0.657	0.298	0.435	0.102
NAC+6-OHDA	3.402	0.6	0.279	0.427	0.09
NAC+6-OHDA	3.541	0.658	0.28	0.43	0.084
NAC+6-OHDA	3.69	0.681	0.312	0.457	0.093
NAC+6-OHDA	3.59	0.649	0.303	0.432	0.11
NAC+6-OHDA	3.756	0.676	0.293	0.458	0.098
NAC+6-OHDA	3.472	0.67	0.29	0.428	0.094

## Sheet: Optomotor response
Treatment group	Optomotor response
CRTL	92.85
CRTL	78.5
CRTL	78.5
CRTL	92.85
CRTL	100
CRTL	100
CRTL	92.85
CRTL	100
CRTL	100
6-OHDA	42.8
6-OHDA	71.4
6-OHDA	35.71
6-OHDA	57.1
6-OHDA	28.5
6-OHDA	21.4
6-OHDA	28.5
6-OHDA	28.5
6-OHDA	28.5
NAC	85.7
NAC	78.5
NAC	92.8
NAC	92.8
NAC	100
NAC	100
NAC	92.8
NAC	92.8
NAC	85.7
NAC+6-OHDA	85.7
NAC+6-OHDA	78.5
NAC+6-OHDA	85.7
NAC+6-OHDA	92.8
NAC+6-OHDA	85.7
NAC+6-OHDA	85.7
NAC+6-OHDA	92.8
NAC+6-OHDA	85.7
NAC+6-OHDA	92.8
